# Supplementary material for: Visual preferences for communicating modelling: a global analysis of COVID-19 policy and decision makers
Source: bioRxiv or medRxiv preprint supplement (doi:10.1101/2024.11.05.24316774), 2025-01-13
Supplement: Supplementary file [file media-1.pdf]

## Questions for discussion in the interview

**Study title:** “The use of infectious disease modelling in Covid-19 response: a multi-country study”

We'll start by sketching out the key actors together (via zoom whiteboard/ pen and paper), and then use the sketch and the below themes to guide our discussion. Opening questions are in blue; optional example follow-on questions in orange.

### **Structures and pathways to policy**

*Could you sketch a rough diagram of ‘who’s who’ / who you feel was important in modelling and policy? (Illustrating some of the key actors and pathways in your country).*

- *Did you have a formal multi-model consortium/ ‘hub’, OR other formal pathway, OR no formal structures?*
- *How did the collaboration with policy begin? Who initiated?*
- *Any evolution of the structure through the pandemic?*
- *Training and certification: ‘Who’s in’? Whose advice is ‘trusted’?*
- *What worked? Recommendations? Practical and theoretical (tried/untried) suggestions welcome.*

### **Collaboration and knowledge transfer**

*We’re interested in international knowledge transfer among modellers. Do you feel you had access to sufficient in-house expertise for modelling? Did you collaborate with other teams?*

- *Sharing of knowledge/ experiences/ contacts/ data/ models across countries?*
- *Strong national or international network of modellers? Would this be helpful?*
- *Thinking across disciplines. Did you have discussions with other scientists informing the response or were efforts quite disjoint? Economics/ behavioural science/ physicians etc.*
- *What worked? Recommendations?*

### **Communication and visualisation**

*First thinking about communication: what level of discourse occurred between modellers and decision-makers throughout the pandemic?*

- *Translation. Who took up the role of translation? (Modellers/ Decision makers/ Intermediary/ Certain individuals). Do you feel this was done effectively?*
- *Visualisation. Can you give an example of a plot that you felt worked really well? And an example of one that was perhaps misunderstood or not quite so effective at demonstrating model findings? Wider question: what types of graphs and plots and reports were most helpful to decision-makers?*
- *Selective publishing. How do you decide what to include or exclude in reports/presentations to policy? Level of detail, how accurate?*

### **Evaluation and reflection**

*What was your biggest mistake? Can you give an example of where you feel modelling got it wrong?*

- *Has there been interest in reflecting on how modelling can be made more useful to public health decision-makers? Perhaps through improved pathways, improved translation, and so on.*
- **Lessons learned / your key takeaways from working on Covid?**
- *Future of modelling. What do you see the future of modelling for outbreaks to look like? How might we get there?*
